# Supplementary material for: The Cytosolic Oligosaccharide-Degrading Proteome of Butyrivibrio Proteoclasticus
Source: PubMed Central journal article supplement (PMC5217386; doi:10.3390/proteomes3040347), 2015-10-27
Supplement: proteomes-03-00347-s001.pdf [file proteomes-03-00347-s001.pdf]

## Supplementary Materials

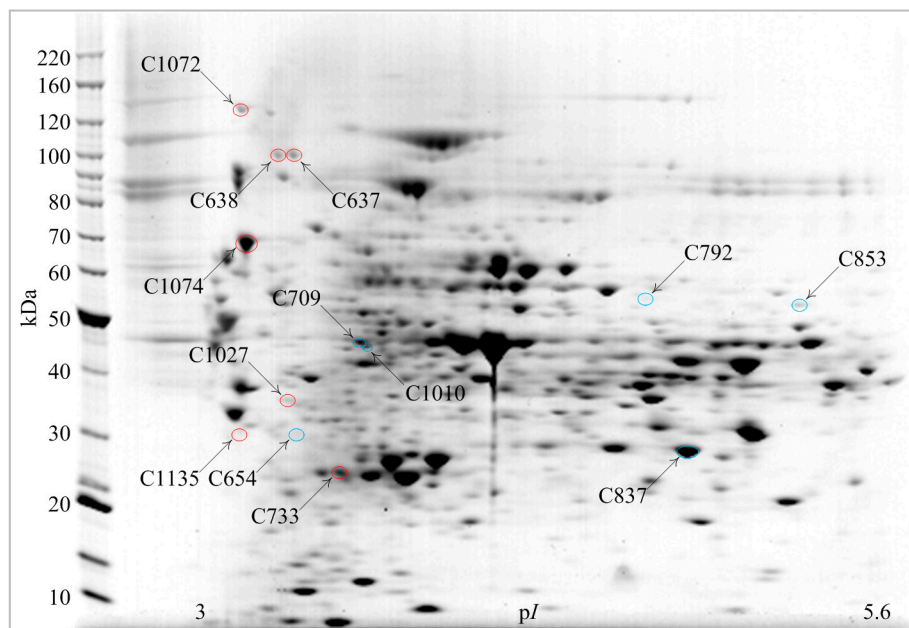

**Figure S1.** Differentially abundant spots between the mid-log phase cells grown on xylan or xylose. Red and blue circles denote spots with increased and decreased abundance respectively in the xylan growth condition. The identities of the circled spots are summarized in Table 3.

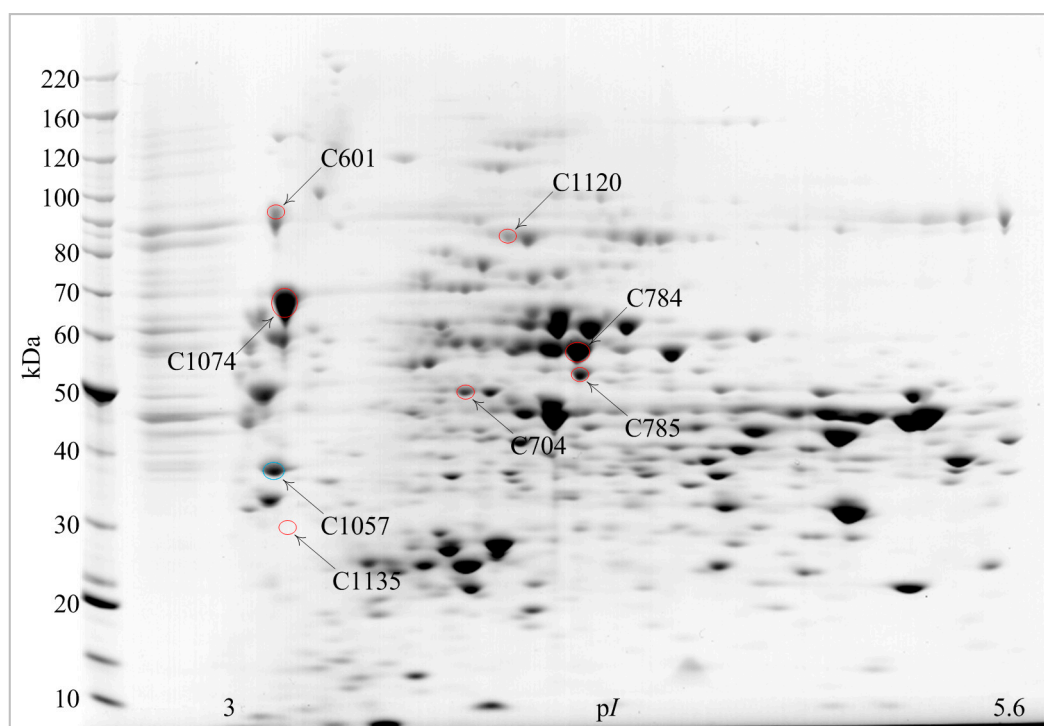

**Figure S2.** Differentially abundant spots between the stationary phase cells grown on xylan or xylose. Red and blue circles denote spots with increased and decreased abundance respectively in the xylan growth condition. The identities of the circled spots are summarized in Table 4.

**Table S1.** Summary of the non-polysaccharide degrading proteins identified in the *B. proteoclasticus* cytosol by 2DE/MALDI-TOF.

| Protein                                                                         | Locus     | Location | Score                 | pI  | kDa  | Pep. | Cov. |
|---------------------------------------------------------------------------------|-----------|----------|-----------------------|-----|------|------|------|
| <b>Amino Acid Biosynthesis</b>                                                  |           |          |                       |     |      |      |      |
| Acetylmethionine aminotransferase, ArgD                                         | Bpr_I1809 | C        | $1.7 \times 10^{-4}$  | 5.1 | 43.9 | 11   | 34%  |
| Aspartate/tyrosine/aromatic aminotransferase                                    | Bpr_I2631 | C        | $3.0 \times 10^{-14}$ | 4.7 | 43.8 | 15   | 46%  |
| Aspartate-semialdehyde dehydrogenase, Asd                                       | Bpr_I1664 | C        | $7.6 \times 10^{-18}$ | 5.5 | 40.1 | 17   | 50%  |
| Branched-chain amino acid aminotransferase, IlvE                                | Bpr_I1650 | C        | $2.4 \times 10^{-12}$ | 5.2 | 39.2 | 13   | 32%  |
| Cysteine synthase, CysK                                                         | Bpr_I1089 | C        | $1.9 \times 10^{-13}$ | 5.0 | 32.3 | 18   | 72%  |
| Diaminopimelate dehydrogenase                                                   | Bpr_I0298 | C        | $9.6 \times 10^{-16}$ | 5.6 | 35.8 | 16   | 49%  |
| Dihydrodipicolinate reductase, DapB                                             | Bpr_I2453 | C        | $2.7 \times 10^{-6}$  | 4.9 | 27.0 | 9    | 46%  |
| Glu/Leu/Phe/Val dehydrogenase                                                   | Bpr_I2129 | C        | $1.2 \times 10^{-30}$ | 5.4 | 48.6 | 31   | 64%  |
| Imidazole glycerol phosphate synthase glutamine amidotransferase subunit        | Bpr_I1240 | C        | $8.0 \times 10^{-3}$  | 4.7 | 22.5 | 8    | 44%  |
| Ketol-acid reductoisomerase, IlvC                                               | Bpr_I1657 | C        | $3.8 \times 10^{-16}$ | 5.1 | 37.3 | 20   | 64%  |
| NADPH-dependent glutamate synthase, GltA3                                       | Bpr_I1306 | C        | $1.9 \times 10^{-4}$  | 5.0 | 49.3 | 8    | 20%  |
| OAH/OAS sulfhydrylase                                                           | Bpr_I2467 | C        | $9.6 \times 10^{-19}$ | 5.6 | 45.9 | 16   | 56%  |
| Phosphoserine aminotransferase, SerC                                            | Bpr_I1341 | C        | $2.4 \times 10^{-15}$ | 5.0 | 40.1 | 20   | 59%  |
| Proline-5-carboxylate reductase, ProC                                           | Bpr_I2765 | C        | $4.6 \times 10^{-4}$  | 5.2 | 28.1 | 7    | 29%  |
| Threonine synthase, ThrC                                                        | Bpr_I1058 | C        | $1.5 \times 10^{-10}$ | 4.8 | 54.4 | 17   | 48%  |
| <b>Carbohydrate Metabolism</b>                                                  |           |          |                       |     |      |      |      |
| 1-phosphofructokinase, PfkB                                                     | Bpr_I2103 | C        | $4.8 \times 10^{-13}$ | 5.0 | 32.4 | 13   | 56%  |
| 2,3-bisphosphoglycerate-independent phosphoglycerate mutase, GpmA               | Bpr_I1294 | C        | $6.1 \times 10^{-18}$ | 4.7 | 56.5 | 18   | 48%  |
| 2-dehydro-3-deoxygluconokinase, KdgK                                            | Bpr_I0932 | C        | $3.8 \times 10^{-14}$ | 5.5 | 37.2 | 18   | 34%  |
| 2-keto-3-deoxygluconate 6-phosphate aldolase/2-keto-4-hydroxyglutarate aldolase | Bpr_I0931 | C        | $3.0 \times 10^{-14}$ | 5.7 | 34.3 | 17   | 62%  |
| 5-keto 4-deoxyuronate isomerase, KduI                                           | Bpr_I0929 | C        | $8.5 \times 10^{-5}$  | 4.8 | 32.7 | 13   | 45%  |
| 6-phosphofructokinase, PfkA1                                                    | Bpr_I0224 | C        | $1.5 \times 10^{-8}$  | 7.1 | 39.0 | 14   | 37%  |
| 6-phosphofructokinase, PfkA4                                                    | Bpr_I2767 | C        | $4.0 \times 10^{-7}$  | 8.1 | 34.8 | 14   | 41%  |
| 6-phosphogluconolactonase                                                       | Bpr_I1331 | C        | $6.3 \times 10^{-5}$  | 4.8 | 39.3 | 8    | 20%  |
| Aldose 1-epimerase                                                              | Bpr_I0228 | C        | $3.0 \times 10^{-15}$ | 4.8 | 38.3 | 16   | 56%  |
| Aldose 1-epimerase family protein                                               | Bpr_I1782 | C        | $7.6 \times 10^{-13}$ | 5.3 | 33.9 | 14   | 46%  |
| Altronate oxidoreductase, UxaB                                                  | Bpr_I1275 | C        | $2.4 \times 10^{-10}$ | 4.6 | 56.0 | 16   | 36%  |
| Deoxyribose-phosphate aldolase, DeoC                                            | Bpr_I1062 | C        | $7.6 \times 10^{-16}$ | 5.2 | 24.0 | 15   | 77%  |
| Fructose-1,6-bisphosphate aldolase, FbaA                                        | Bpr_I2903 | C        | $3.0 \times 10^{-13}$ | 5.1 | 30.5 | 14   | 49%  |
| Galactokinase, GalK                                                             | Bpr_I2843 | C        | $1.4 \times 10^{-3}$  | 4.6 | 43.4 | 7    | 16%  |
| Glucose-6-phosphate isomerase, Gpi                                              | Bpr_I0035 | C        | $1.2 \times 10^{-15}$ | 5.0 | 57.1 | 16   | 41%  |
| Glyceraldehyde-3-phosphate dehydrogenase, Gap                                   | Bpr_I2050 | C        | $7.6 \times 10^{-10}$ | 5.7 | 36.9 | 11   | 34%  |
| Lactaldehyde reductase, FucO                                                    | Bpr_I2065 | C        | $1.8 \times 10^{-3}$  | 4.7 | 41.2 | 9    | 17%  |
| L-fucose isomerase related protein                                              | Bpr_I0185 | C        | $1.5 \times 10^{-11}$ | 4.9 | 55.4 | 17   | 39%  |
| Phosphoenolpyruvate carboxykinase, PckA                                         | Bpr_I0091 | C        | $1.5 \times 10^{-14}$ | 4.9 | 59.5 | 18   | 32%  |
| Phosphoglycerate kinase, Pgc                                                    | Bpr_I2049 | C        | $6.1 \times 10^{-19}$ | 5.4 | 43.7 | 22   | 59%  |
| Pyruvate kinase, PykA                                                           | Bpr_I0083 | C        | $1.3 \times 10^{-3}$  | 4.8 | 51.7 | 9    | 20%  |
| Transaldolase                                                                   | Bpr_I1511 | C        | $5.9 \times 10^{-7}$  | 4.8 | 23.4 | 11   | 71%  |

Table S1. *Cont.*

| Protein                                              | Locus     | Location | Score                 | pI  | kDa   | Pep. | Cov. |
|------------------------------------------------------|-----------|----------|-----------------------|-----|-------|------|------|
| <b>Carbohydrate Metabolism</b>                       |           |          |                       |     |       |      |      |
| Transketolase subunit A, TktA3                       | Bpr_I2813 | C        | $3.4 \times 10^{-2}$  | 5.4 | 30.0  | 6    | 19%  |
| Transketolase subunit B, TktB3                       | Bpr_I2812 | C        | $2.4 \times 10^{-7}$  | 5.5 | 33.0  | 10   | 37%  |
| Triosephosphate isomerase, TpiA                      | Bpr_I2048 | C        | $1.2 \times 10^{-18}$ | 4.6 | 26.8  | 18   | 64%  |
| UDP-galactose 4-epimerase, GalE                      | Bpr_I0192 | C        | $4.8 \times 10^{-14}$ | 5.2 | 37.2  | 18   | 47%  |
| UTP-glucose-1-phosphate uridylyltransferase, GalU    | Bpr_I0191 | C        | $1.9 \times 10^{-20}$ | 4.6 | 45.8  | 23   | 56%  |
| Xylulokinase, XylB                                   | Bpr_I0173 | C        | $1.5 \times 10^{-10}$ | 4.9 | 53.7  | 14   | 38%  |
| <b>Cell Cycle</b>                                    |           |          |                       |     |       |      |      |
| DNA polymerase III $\beta$ -subunit, DnaN            | Bpr_I0002 | C        | $1.2 \times 10^{-13}$ | 4.7 | 41.4  | 17   | 50%  |
| Single-stranded DNA binding protein, Ssb1            | Bpr_I0240 | C        | $7.6 \times 10^{-10}$ | 4.7 | 16.6  | 12   | 63%  |
| <b>Cell Envelope</b>                                 |           |          |                       |     |       |      |      |
| Aminotransferase DegT/DnrJ/EryC1/StrS family         | Bpr_I0345 | C        | $4.8 \times 10^{-11}$ | 5.8 | 44.9  | 14   | 33%  |
| Aminotransferase DegT/DnrJ/EryC1/StrS family         | Bpr_I2311 | C        | $3.8 \times 10^{-10}$ | 5.0 | 51.0  | 18   | 35%  |
| Aminotransferase DegT/DnrJ/EryC1/StrS family         | Bpr_I2543 | C        | $1.2 \times 10^{-8}$  | 5.1 | 47.3  | 14   | 37%  |
| Cell wall binding domain-containing protein          | Bpr_I0264 | S        | $3.0 \times 10^{-16}$ | 4.3 | 195.3 | 31   | 19%  |
| dTDP-4-dehydrorhamnose 3,5-epimerase, RfbC2          | Bpr_I0548 | C        | $9.6 \times 10^{-11}$ | 4.7 | 20.6  | 11   | 49%  |
| dTDP-4-dehydrorhamnose reductase, RfbD1              | Bpr_I2582 | C        | $3.0 \times 10^{-7}$  | 4.8 | 32.1  | 9    | 41%  |
| Glycosyl transferase GT2 family                      | Bpr_I2565 | C        | $2.3 \times 10^{-2}$  | 5.2 | 38.1  | 8    | 29%  |
| NAD dependent epimerase/dehydratase                  | Bpr_I2647 | C        | $1.5 \times 10^{-14}$ | 5.5 | 38.8  | 17   | 48%  |
| NAD dependent epimerase/dehydratase                  | Bpr_I2930 | C        | $4.8 \times 10^{-11}$ | 8.8 | 31.5  | 11   | 44%  |
| NAD-dependent epimerase/dehydratase                  | Bpr_I0517 | C        | $1.9 \times 10^{-21}$ | 4.9 | 42.0  | 18   | 51%  |
| NAD-dependent epimerase/dehydratase                  | Bpr_I2310 | C        | $1.5 \times 10^{-2}$  | 5.0 | 34.2  | 10   | 33%  |
| NAD-dependent epimerase/dehydratase                  | Bpr_I2537 | C        | $1.5 \times 10^{-13}$ | 4.7 | 36.0  | 14   | 52%  |
| Nucleotide sugar dehydrogenase                       | Bpr_I0828 | C        | $4.7 \times 10^{-2}$  | 5.0 | 46.1  | 8    | 18%  |
| Phosphoglucomutase/phosphomannomutase family protein | Bpr_I0554 | C        | $7.6 \times 10^{-9}$  | 4.7 | 66.0  | 15   | 20%  |
| S-adenosyl-methyltransferase, MraW                   | Bpr_I1869 | C        | $1.9 \times 10^{-9}$  | 7.0 | 35.3  | 13   | 41%  |
| <b>Cellular Processes</b>                            |           |          |                       |     |       |      |      |
| Chemotaxis protein methyltransferase, CheR           | Bpr_I2033 | C        | $1.5 \times 10^{-9}$  | 8.4 | 30.5  | 14   | 42%  |
| Chemotaxis-specific methyltransferase, CheB          | Bpr_I1384 | C        | $4.6 \times 10^{-6}$  | 8.1 | 38.6  | 10   | 32%  |
| Flagellar hook protein, FlgE1                        | Bpr_I1367 | C        | $1.5 \times 10^{-4}$  | 4.2 | 112.3 | 12   | 14%  |
| Flagellar motor switch protein, FliG                 | Bpr_I1359 | C        | $9.6 \times 10^{-9}$  | 4.3 | 38.6  | 9    | 33%  |
| Superoxide dismutase, SodA                           | Bpr_I0467 | C        | $1.9 \times 10^{-13}$ | 5.3 | 24.1  | 11   | 61%  |
| <b>Central Metabolism</b>                            |           |          |                       |     |       |      |      |
| Agmatine deiminase, AguA                             | Bpr_I1200 | C        | $1.2 \times 10^{-8}$  | 4.2 | 49.5  | 12   | 30%  |
| Carboxynorspermidine dehydrogenase                   | Bpr_I1198 | C        | $6.9 \times 10^{-2}$  | 4.6 | 47.4  | 9    | 20%  |
| N-carbamoylputrescine amidohydrolase, AguB           | Bpr_I1201 | C        | $4.8 \times 10^{-15}$ | 5.0 | 33.8  | 16   | 56%  |
| S-adenosylmethionine synthetase, MetK                | Bpr_I2769 | C        | $4.8 \times 10^{-16}$ | 4.9 | 43.1  | 16   | 38%  |
| <b>Energy Metabolism</b>                             |           |          |                       |     |       |      |      |
| 2-enoate reductase                                   | Bpr_I1763 | C        | $1.3 \times 10^{-4}$  | 7.3 | 76.0  | 9    | 17%  |
| 2-enoate reductase                                   | Bpr_I1977 | C        | $4.8 \times 10^{-2}$  | 6.2 | 77.4  | 4    | 12%  |
| 3-hydroxybutyryl-CoA dehydrogenase, Hbd              | Bpr_I2486 | S        | $6.1 \times 10^{-14}$ | 5.2 | 31.2  | 13   | 47%  |
| ATP synthase F1 $\alpha$ -subunit, AtpA1             | Bpr_I0166 | C        | $1.9 \times 10^{-10}$ | 5.3 | 55.0  | 15   | 31%  |

Table S1. *Cont.*

| Protein                                                 | Locus      | Location | Score                 | pI  | kDa   | Pep. | Cov. |
|---------------------------------------------------------|------------|----------|-----------------------|-----|-------|------|------|
| <b>Energy Metabolism</b>                                |            |          |                       |     |       |      |      |
| ATP synthase F1 $\beta$ -subunit, AtpD1                 | Bpr_I0168  | C        | $4.8 \times 10^{-16}$ | 4.6 | 50.3  | 15   | 41%  |
| Butyrate kinase, Buk                                    | Bpr_I2323  | C        | $6.1 \times 10^{-22}$ | 5.1 | 38.7  | 18   | 66%  |
| Butyryl-CoA dehydrogenase, Bcd                          | Bpr_I2485  | C        | $3.8 \times 10^{-17}$ | 6.1 | 42.5  | 21   | 60%  |
| Crotonase, Crt                                          | Bpr_I2487  | C        | $1.2 \times 10^{-14}$ | 4.7 | 28.0  | 19   | 65%  |
| Electron transfer flavoprotein $\alpha$ -subunit, EtfA  | Bpr_I2483  | C        | $1.2 \times 10^{-8}$  | 4.8 | 37.4  | 12   | 36%  |
| Electron transfer flavoprotein $\beta$ -subunit, EtfB   | Bpr_I2484  | C        | $1.5 \times 10^{-11}$ | 5.2 | 28.4  | 14   | 53%  |
| Isocitrate dehydrogenase, Icd                           | Bpr_I1102  | C        | $4.8 \times 10^{-13}$ | 5.1 | 45.1  | 18   | 42%  |
| Methylmalonyl-CoA decarboxylase $\alpha$ -subunit, MmdA | Bpr_I1226  | C        | $3.9 \times 10^{-7}$  | 4.5 | 50.9  | 12   | 28%  |
| Phosphate acetyltransferase, Pta                        | Bpr_III011 | C        | $1.3 \times 10^{-2}$  | 5.2 | 14.4  | 7    | 54%  |
| Phosphate butyryltransferase, Ptb                       | Bpr_I2324  | C        | $4.8 \times 10^{-16}$ | 5.1 | 33.3  | 19   | 72%  |
| Pyruvate formate lyase, PflB                            | Bpr_I0112  | C        | $3.0 \times 10^{-24}$ | 5.7 | 84.9  | 30   | 50%  |
| Pyruvate phosphate dikinase, PpdK                       | Bpr_I1154  | C        | $7.6 \times 10^{-15}$ | 4.8 | 104.3 | 28   | 28%  |
| Pyruvate:ferredoxin oxidoreductase                      | Bpr_I0269  | C        | $2.4 \times 10^{-14}$ | 5.2 | 127.3 | 25   | 21%  |
| Thiolase, ThlA1                                         | Bpr_I2488  | C        | $2.4 \times 10^{-14}$ | 5.0 | 42.0  | 15   | 51%  |
| Thiolase, ThlA2                                         | Bpr_I2475  | S        | $3.8 \times 10^{-8}$  | 6.0 | 41.0  | 12   | 24%  |
| Thioredoxin-disulfide reductase, TrxB                   | Bpr_I2491  | C        | $9.6 \times 10^{-8}$  | 4.5 | 33.7  | 13   | 43%  |
| <b>Hypothetical</b>                                     |            |          |                       |     |       |      |      |
| Hypothetical protein                                    | Bpr_I0280  | C        | $3.8 \times 10^{-15}$ | 8.4 | 23.2  | 16   | 76%  |
| Hypothetical protein                                    | Bpr_I0417  | C        | $7.1 \times 10^{-3}$  | 4.9 | 39.8  | 11   | 29%  |
| Hypothetical protein                                    | Bpr_I0592  | C        | $6.1 \times 10^{-10}$ | 7.3 | 32.3  | 11   | 38%  |
| Hypothetical protein                                    | Bpr_I0874  | C        | $1.0 \times 10^{-5}$  | 4.5 | 14.8  | 5    | 36%  |
| Hypothetical protein                                    | Bpr_I0962  | C        | $3.8 \times 10^{-9}$  | 4.3 | 17.3  | 9    | 49%  |
| Hypothetical protein                                    | Bpr_I1177  | C        | $2.4 \times 10^{-11}$ | 4.3 | 24.7  | 12   | 65%  |
| Hypothetical protein                                    | Bpr_I1179  | C        | $1.2 \times 10^{-7}$  | 4.7 | 24.9  | 11   | 45%  |
| Hypothetical protein                                    | Bpr_I1180  | C        | $9.6 \times 10^{-18}$ | 7.4 | 36.4  | 18   | 53%  |
| Hypothetical protein                                    | Bpr_I1213  | C        | $1.4 \times 10^{-5}$  | 4.3 | 26.5  | 8    | 39%  |
| Hypothetical protein                                    | Bpr_I1281  | C        | $1.5 \times 10^{-13}$ | 4.6 | 34.1  | 18   | 52%  |
| Hypothetical protein                                    | Bpr_I1477  | C        | $2.9 \times 10^{-4}$  | 4.2 | 19.1  | 5    | 49%  |
| Hypothetical protein                                    | Bpr_I1608  | C        | $3.1 \times 10^{-6}$  | 4.6 | 47.5  | 10   | 26%  |
| Hypothetical protein                                    | Bpr_I2291  | S        | $7.1 \times 10^{-7}$  | 4.2 | 42.6  | 8    | 25%  |
| Hypothetical protein                                    | Bpr_I2455  | C        | $6.1 \times 10^{-26}$ | 4.7 | 47.7  | 26   | 58%  |
| Hypothetical protein                                    | Bpr_I2494  | C        | $6.1 \times 10^{-8}$  | 4.3 | 33.0  | 11   | 41%  |
| Hypothetical protein                                    | Bpr_I2583  | S        | $8.7 \times 10^{-6}$  | 4.3 | 44.3  | 9    | 24%  |
| Hypothetical protein                                    | Bpr_I2606  | C        | $4.2 \times 10^{-5}$  | 4.8 | 41.1  | 13   | 31%  |
| Hypothetical protein                                    | Bpr_I2608  | C        | $6.1 \times 10^{-16}$ | 7.3 | 32.8  | 17   | 44%  |
| Hypothetical protein                                    | Bpr_I2619  | C        | $3.8 \times 10^{-8}$  | 4.5 | 8.6   | 6    | 46%  |
| Hypothetical protein                                    | Bpr_I2634  | C        | $4.8 \times 10^{-7}$  | 9.8 | 16.4  | 8    | 50%  |
| Hypothetical protein                                    | Bpr_I2744  | C        | $2.4 \times 10^{-8}$  | 4.8 | 28.5  | 10   | 51%  |
| Hypothetical protein                                    | Bpr_III133 | C        | $1.6 \times 10^{-3}$  | 5.6 | 57.9  | 10   | 16%  |
| <b>Lipid Metabolism</b>                                 |            |          |                       |     |       |      |      |
| 3-oxoacyl-(acyl-carrier-protein) synthase, FabF         | Bpr_I1268  | C        | $2.0 \times 10^{-6}$  | 5.3 | 44.5  | 11   | 28%  |
| Glycerol kinase, GlpK                                   | Bpr_I1744  | C        | $3.6 \times 10^{-5}$  | 4.9 | 55.6  | 9    | 18%  |

Table S1. Cont.

| Protein                                                        | Locus     | Location | Score                 | pI   | kDa   | Pep. | Cov. |
|----------------------------------------------------------------|-----------|----------|-----------------------|------|-------|------|------|
| <b>Nucleic Acid Metabolism</b>                                 |           |          |                       |      |       |      |      |
| Excinuclease ABC A subunit, UvrA                               | Bpr_I2597 | C        | $3.8 \times 10^{-12}$ | 7.4  | 106.8 | 20   | 26%  |
| Type I restriction modification system S subunit               | Bpr_IV100 | C        | $1.5 \times 10^{-2}$  | 6.1  | 46.5  | 7    | 18%  |
| <b>Nucleotide Metabolism</b>                                   |           |          |                       |      |       |      |      |
| 5-aminoimidazole-4-carboxamide ribonucleotide transformylase   | Bpr_I0732 | C        | $1.5 \times 10^{-12}$ | 5.1  | 44.4  | 12   | 38%  |
| Adenylate kinase, Adk                                          | Bpr_I0615 | C        | $1.5 \times 10^{-10}$ | 5.1  | 23.8  | 12   | 72%  |
| Adenylosuccinate lyase, PurB                                   | Bpr_I2212 | C        | $1.2 \times 10^{-10}$ | 5.4  | 53.7  | 16   | 28%  |
| Dihydroorotate dehydrogenase, PyrD                             | Bpr_I2788 | C        | $7.6 \times 10^{-10}$ | 5.1  | 32.3  | 13   | 47%  |
| IMP cyclohydrolase, PurO                                       | Bpr_I0731 | C        | $4.0 \times 10^{-6}$  | 4.7  | 32.2  | 7    | 21%  |
| Inosine-uridine preferring nucleoside hydrolase                | Bpr_I0724 | C        | $7.4 \times 10^{-3}$  | 4.5  | 32.9  | 9    | 25%  |
| Phosphoribosylamine-glycine ligase, PurD                       | Bpr_I0870 | C        | $1.8 \times 10^{-6}$  | 4.6  | 46.3  | 12   | 29%  |
| Phosphoribosylaminoimidazole-succinocarboxamide synthase, PurC | Bpr_I1144 | C        | $3.8 \times 10^{-18}$ | 4.7  | 33.3  | 21   | 75%  |
| Purine nucleoside phosphorylase, DeoD2                         | Bpr_I2948 | C        | $4.8 \times 10^{-13}$ | 5.1  | 26.1  | 16   | 55%  |
| Purine-nucleoside phosphorylase, DeoD1                         | Bpr_I1527 | C        | $3.0 \times 10^{-12}$ | 4.6  | 29.5  | 13   | 67%  |
| Uridine phosphorylase, Udp                                     | Bpr_I1561 | C        | $9.6 \times 10^{-13}$ | 5.4  | 28.1  | 14   | 69%  |
| Uridylate kinase, PyrH                                         | Bpr_I0953 | C        | $1.9 \times 10^{-13}$ | 5.4  | 25.5  | 15   | 55%  |
| <b>Plasmid Functions</b>                                       |           |          |                       |      |       |      |      |
| Single stranded DNA binding protein, Ssb3                      | Bpr_I1423 | C        | $1.9 \times 10^{-10}$ | 4.7  | 16.3  | 12   | 60%  |
| <b>Protein Fate</b>                                            |           |          |                       |      |       |      |      |
| Chaperone protein, DnaK                                        | Bpr_I2625 | C        | $9.6 \times 10^{-10}$ | 4.5  | 66.8  | 16   | 28%  |
| Chaperonin, GroEL                                              | Bpr_I1193 | C        | $1.1 \times 10^{-6}$  | 5.0  | 60.0  | 19   | 32%  |
| Oligoendopeptidase, PepF1                                      | Bpr_I0779 | C        | $1.9 \times 10^{-13}$ | 4.7  | 68.9  | 22   | 32%  |
| Peptidase M16 family                                           | Bpr_I1215 | C        | $3.0 \times 10^{-39}$ | 4.6  | 111.5 | 44   | 46%  |
| Peptidase U62 family                                           | Bpr_I2456 | C        | $6.1 \times 10^{-9}$  | 4.8  | 52.3  | 15   | 33%  |
| Peptidyl-prolyl <i>cis</i> -trans isomerase FKBP-type          | Bpr_I1031 | C        | $2.5 \times 10^{-6}$  | 4.1  | 33.4  | 8    | 25%  |
| Serine protease subtilisin family                              | Bpr_I2629 | S        | $2.8 \times 10^{-5}$  | 3.8  | 153.3 | 15   | 12%  |
| <b>Protein Synthesis</b>                                       |           |          |                       |      |       |      |      |
| Aspartyl-tRNA synthetase, AspS                                 | Bpr_I0140 | C        | $3.8 \times 10^{-14}$ | 4.7  | 69.2  | 23   | 35%  |
| Endoribonuclease L-PSP                                         | Bpr_I2149 | C        | $2.8 \times 10^{-5}$  | 4.4  | 13.5  | 4    | 56%  |
| Methionyl-tRNA synthetase, MetG                                | Bpr_I2807 | C        | $9.6 \times 10^{-9}$  | 4.9  | 76.4  | 21   | 32%  |
| Polyribonucleotide nucleotidyltransferase                      | Bpr_I0975 | C        | $7.6 \times 10^{-15}$ | 4.9  | 76.5  | 21   | 37%  |
| Ribosomal protein L1, RplA                                     | Bpr_I2299 | C        | $1.2 \times 10^{-12}$ | 9.8  | 24.6  | 16   | 58%  |
| Ribosomal protein L10, RplJ                                    | Bpr_I2371 | C        | $1.8 \times 10^{-4}$  | 4.6  | 20.4  | 8    | 32%  |
| Ribosomal protein L13, RplM                                    | Bpr_I0630 | C        | $6.1 \times 10^{-8}$  | 9.9  | 16.2  | 11   | 77%  |
| Ribosomal protein L18, RplR                                    | Bpr_I0610 | C        | $3.0 \times 10^{-6}$  | 10.5 | 13.5  | 9    | 48%  |
| Ribosomal protein L21, RplU                                    | Bpr_I1443 | C        | $7.6 \times 10^{-3}$  | 10.3 | 11.3  | 5    | 41%  |
| Ribosomal protein L22, RplV                                    | Bpr_I0599 | C        | $4.4 \times 10^{-6}$  | 10.7 | 15.1  | 8    | 56%  |
| Ribosomal protein L3, RplC                                     | Bpr_I0594 | C        | $1.9 \times 10^{-24}$ | 10.6 | 24.3  | 25   | 84%  |
| Ribosomal protein L4, RplD                                     | Bpr_I0595 | C        | $4.0 \times 10^{-7}$  | 10.2 | 22.9  | 9    | 47%  |
| Ribosomal protein L5, RplE                                     | Bpr_I0606 | C        | $3.8 \times 10^{-11}$ | 9.8  | 20.4  | 15   | 63%  |
| Ribosomal protein L6, RplF                                     | Bpr_I0609 | C        | $2.4 \times 10^{-15}$ | 10.3 | 19.4  | 14   | 60%  |

Table S1. *Cont.*

| Protein                                                                   | Locus     | Location | Score                 | pI   | kDa   | Pep. | Cov. |
|---------------------------------------------------------------------------|-----------|----------|-----------------------|------|-------|------|------|
| <b>Protein Synthesis</b>                                                  |           |          |                       |      |       |      |      |
| Ribosomal protein S1, RpsA                                                | Bpr_I2035 | C        | $1.5 \times 10^{-19}$ | 4.6  | 41.9  | 21   | 54%  |
| Ribosomal protein S2, RpsB                                                | Bpr_I1395 | C        | $9.6 \times 10^{-9}$  | 8.4  | 27.6  | 11   | 39%  |
| Ribosomal protein S3, RpsC                                                | Bpr_I0600 | C        | $9.6 \times 10^{-8}$  | 9.6  | 24.6  | 12   | 53%  |
| Ribosomal protein S4, RpsD                                                | Bpr_I0622 | C        | $2.4 \times 10^{-11}$ | 10.6 | 24.1  | 13   | 43%  |
| Ribosomal protein S5, RpsE                                                | Bpr_I0611 | C        | $3.0 \times 10^{-17}$ | 10.5 | 17.9  | 15   | 79%  |
| Ribosomal protein S7, RpsG                                                | Bpr_I2366 | C        | $1.2 \times 10^{-11}$ | 10.5 | 17.5  | 13   | 70%  |
| Ribosomal protein S9, RpsI                                                | Bpr_I0631 | C        | $3.8 \times 10^{-13}$ | 11.1 | 15.4  | 11   | 67%  |
| Single stranded nucleic acid binding protein                              | Bpr_I2957 | C        | $3.0 \times 10^{-10}$ | 6.3  | 28.3  | 14   | 52%  |
| Threonyl-tRNA synthetase, ThrZ                                            | Bpr_I2374 | C        | $1.2 \times 10^{-11}$ | 5.0  | 73.7  | 22   | 26%  |
| Translation elongation factor EF-G-like protein                           | Bpr_I1098 | C        | $3.0 \times 10^{-26}$ | 4.9  | 77.3  | 31   | 46%  |
| Translation elongation factor G, FusA                                     | Bpr_I2365 | C        | $9.6 \times 10^{-15}$ | 4.6  | 78.0  | 21   | 27%  |
| Translation elongation factor Ts, Tsf                                     | Bpr_I1396 | C        | $3.0 \times 10^{-3}$  | 4.8  | 34.9  | 10   | 33%  |
| Translation elongation factor Tu, TufA                                    | Bpr_I2364 | C        | $3.0 \times 10^{-21}$ | 4.8  | 43.6  | 19   | 62%  |
| tRNA (guanine-N7)-methyltransferase, TrmB                                 | Bpr_I2923 | C        | $4.4 \times 10^{-7}$  | 7.6  | 25.1  | 10   | 51%  |
| <b>Regulation</b>                                                         |           |          |                       |      |       |      |      |
| Anti-sigma factor antagonist                                              | Bpr_I0800 | C        | $4.9 \times 10^{-7}$  | 4.2  | 10.8  | 7    | 89%  |
| Anti-sigma factor antagonist/phosphotransferase domain-containing protein | Bpr_I0249 | C        | $9.6 \times 10^{-14}$ | 4.6  | 49.8  | 20   | 48%  |
| Cold shock domain protein, CspD1                                          | Bpr_I2451 | C        | $2.3 \times 10^{-6}$  | 4.6  | 7.3   | 5    | 89%  |
| <b>Signal transduction</b>                                                |           |          |                       |      |       |      |      |
| GGDEF domain-containing protein                                           | Bpr_I1183 | C        | $1.8 \times 10^{-5}$  | 4.6  | 53.0  | 10   | 24%  |
| Hpr kinase/phosphatase, HprK                                              | Bpr_I0099 | C        | $1.3 \times 10^{-4}$  | 5.1  | 35.9  | 11   | 40%  |
| PhoH family protein                                                       | Bpr_I1309 | C        | $1.2 \times 10^{-7}$  | 8.6  | 38.6  | 10   | 34%  |
| S-ribosylhomocysteinase, LuxS                                             | Bpr_I0033 | C        | $7.6 \times 10^{-13}$ | 5.0  | 18.2  | 11   | 54%  |
| <b>Transcription</b>                                                      |           |          |                       |      |       |      |      |
| DNA directed RNA polymerase $\beta$ -subunit, RpoB                        | Bpr_I2369 | C        | $9.6 \times 10^{-13}$ | 4.6  | 145.5 | 22   | 20%  |
| DNA directed RNA polymerase $\beta'$ -subunit, RpoC                       | Bpr_I2368 | C        | $1.5 \times 10^{-23}$ | 6.6  | 139.3 | 36   | 30%  |
| DNA-directed RNA polymerase $\alpha$ -subunit, RpoA                       | Bpr_I0623 | C        | $3.8 \times 10^{-18}$ | 4.4  | 35.1  | 17   | 58%  |
| Transcription antitermination factor, NusB                                | Bpr_I0979 | C        | $7.3 \times 10^{-7}$  | 4.3  | 15.3  | 8    | 57%  |
| <b>Transporters</b>                                                       |           |          |                       |      |       |      |      |
| ABC transporter ATP-binding protein                                       | Bpr_I2802 | C        | $6.1 \times 10^{-11}$ | 6.7  | 41.1  | 17   | 43%  |
| Amino acid ABC transporter substrate-binding protein                      | Bpr_I1826 | S        | $5.8 \times 10^{-4}$  | 4.0  | 31.6  | 7    | 21%  |
| Oligopeptide ABC transporter substrate-binding protein, OppA1             | Bpr_I1276 | S        | $1.2 \times 10^{-20}$ | 4.0  | 83.1  | 25   | 35%  |
| Peptide/nickel ABC transporter periplasmic protein                        | Bpr_I2750 | S        | $8.0 \times 10^{-7}$  | 3.9  | 57.9  | 9    | 23%  |
| Peptide/nickel ABC transporter substrate-binding protein                  | Bpr_I1860 | S        | $7.6 \times 10^{-11}$ | 4.1  | 58.4  | 16   | 41%  |
| Sugar ABC transporter substrate-binding protein                           | Bpr_I0182 | S        | $7.6 \times 10^{-7}$  | 4.1  | 63.3  | 13   | 27%  |
| Sugar ABC transporter substrate-binding protein                           | Bpr_I0237 | S        | $8.5 \times 10^{-3}$  | 3.9  | 64.8  | 6    | 14%  |
| Sugar ABC transporter substrate-binding protein                           | Bpr_I0313 | S        | $1.1 \times 10^{-3}$  | 3.8  | 55.2  | 7    | 11%  |
| Sugar ABC transporter substrate-binding protein                           | Bpr_I0937 | S        | $9.6 \times 10^{-14}$ | 4.1  | 61.3  | 15   | 35%  |
| Sugar ABC transporter substrate-binding protein                           | Bpr_I1589 | S        | $7.3 \times 10^{-6}$  | 3.9  | 61.1  | 13   | 34%  |
| Sugar ABC transporter substrate-binding protein                           | Bpr_I1667 | S        | $7.6 \times 10^{-11}$ | 3.9  | 47.8  | 11   | 42%  |

**Table S1. Cont.**

| Protein                                                          | Locus      | Location | Score                 | pI  | kDa  | Pep. | Cov. |
|------------------------------------------------------------------|------------|----------|-----------------------|-----|------|------|------|
| <b>Transporters</b>                                              |            |          |                       |     |      |      |      |
| Sugar ABC transporter substrate-binding protein                  | Bpr_I1720  | S        | $7.4 \times 10^{-4}$  | 4.0 | 49.3 | 9    | 18%  |
| Sugar ABC transporter substrate-binding protein                  | Bpr_I2010  | S        | $1.9 \times 10^{-6}$  | 3.7 | 47.3 | 9    | 35%  |
| Sugar ABC transporter substrate binding protein                  | Bpr_I2344  | S        | $4.4 \times 10^{-4}$  | 3.9 | 52.3 | 10   | 27%  |
| Sugar ABC transporter substrate-binding protein                  | Bpr_I2443  | S        | $1.9 \times 10^{-11}$ | 4.0 | 57.0 | 16   | 31%  |
| Xylose ABC transporter substrate-binding protein                 | Bpr_I1173  | S        | $9.6 \times 10^{-12}$ | 4.2 | 38.4 | 14   | 57%  |
| <b>Unknown function</b>                                          |            |          |                       |     |      |      |      |
| Acetyltransferase                                                | Bpr_I1661  | C        | $4.8 \times 10^{-8}$  | 6.7 | 24.9 | 10   | 49%  |
| Acetyltransferase GNAT family                                    | Bpr_I0656  | C        | $3.0 \times 10^{-7}$  | 6.7 | 21.0 | 9    | 51%  |
| Aminotransferase domain-containing protein                       | Bpr_I1980  | C        | $1.5 \times 10^{-11}$ | 5.5 | 48.3 | 12   | 24%  |
| FAD dependent oxidoreductase                                     | Bpr_I2038  | C        | $2.4 \times 10^{-6}$  | 6.7 | 45.2 | 10   | 26%  |
| Hydrolase $\alpha/\beta$ -fold family                            | Bpr_I2806  | C        | $6.1 \times 10^{-8}$  | 8.6 | 36.5 | 14   | 46%  |
| NUDIX domain-containing protein                                  | Bpr_I1938  | C        | $7.6 \times 10^{-12}$ | 4.2 | 18.8 | 12   | 70%  |
| Phosphoribulokinase/uridine kinase family protein                | Bpr_I0923  | C        | $1.9 \times 10^{-16}$ | 6.9 | 63.1 | 18   | 35%  |
| Pyridoxamine 5'-phosphate oxidase family protein                 | Bpr_I1023  | C        | $1.2 \times 10^{-5}$  | 5.3 | 15.0 | 6    | 61%  |
| UBA/Ts-N domain-containing protein                               | Bpr_III040 | C        | $4.5 \times 10^{-7}$  | 4.5 | 13.6 | 8    | 42%  |
| <b>Vitamins and Cofactors</b>                                    |            |          |                       |     |      |      |      |
| Cobalamin biosynthesis protein. CobW1                            | Bpr_I2021  | C        | $3.8 \times 10^{-8}$  | 4.4 | 36.9 | 9    | 32%  |
| FeS assembly protein. SufD                                       | Bpr_I0053  | C        | $7.6 \times 10^{-12}$ | 4.5 | 42.7 | 11   | 37%  |
| Methylenetetrahydrofolate dehydrogenase/<br>cyclohydrolase. FOLD | Bpr_I1303  | C        | $1.5 \times 10^{-5}$  | 5.0 | 30.6 | 9    | 27%  |

**Table S2.** Summary of the non-polysaccharidase degrading proteins identified in the *B. proteoclasticus* cytosol by LC-MS/MS.

| Protein                                                | Locus     | Location | Score                 | pI  | kDa  | Cov. |
|--------------------------------------------------------|-----------|----------|-----------------------|-----|------|------|
| <b>Amino Acid Biosynthesis</b>                         |           |          |                       |     |      |      |
| Anthranilate phosphoribosyltransferase, TrpD           | Bpr_I0012 | C        | $1.5 \times 10^{-12}$ | 5.1 | 36.6 | 26%  |
| Aspartate/tyrosine/aromatic aminotransferase           | Bpr_I2631 | C        | $2.3 \times 10^{-13}$ | 4.7 | 43.8 | 18%  |
| Aspartate-semialdehyde dehydrogenase, Asd              | Bpr_I1664 | C        | $8.2 \times 10^{-14}$ | 5.5 | 40.1 | 54%  |
| ATP phosphoribosyltransferase regulatory subunit, HisZ | Bpr_I1451 | C        | $2.0 \times 10^{-6}$  | 4.5 | 41.3 | 11%  |
| Branched-chain amino acid aminotransferase, IlvE       | Bpr_I1650 | C        | $3.4 \times 10^{-8}$  | 5.2 | 39.2 | 21%  |
| Chorismate mutase/prephenate dehydratase, PheA         | Bpr_I1730 | C        | $1.4 \times 10^{-9}$  | 5.0 | 42.4 | 13%  |
| Cysteine synthase, CysK                                | Bpr_I1089 | C        | $8.9 \times 10^{-9}$  | 5.0 | 32.3 | 14%  |
| D-3-phosphoglycerate dehydrogenase, SerA               | Bpr_I1342 | C        | $4.4 \times 10^{-13}$ | 5.3 | 42.0 | 26%  |
| Diaminopimelate decarboxylase, LysA                    | Bpr_I1243 | C        | $4.8 \times 10^{-12}$ | 4.8 | 48.0 | 9%   |
| Diaminopimelate dehydrogenase                          | Bpr_I0298 | C        | $9.9 \times 10^{-15}$ | 5.6 | 35.8 | 41%  |
| Diaminopimelate epimerase, DapF                        | Bpr_I2388 | C        | $2.2 \times 10^{-5}$  | 4.4 | 33.5 | 6%   |
| Dihydroxy-acid dehydratase, IlvD                       | Bpr_I1338 | C        | $1.0 \times 10^{-30}$ | 6.0 | 58.9 | 30%  |
| Glu/Leu/Phe/Val dehydrogenase                          | Bpr_I2129 | C        | $1.0 \times 10^{-30}$ | 5.4 | 48.6 | 57%  |
| Histidinol dehydrogenase, HisD                         | Bpr_I1449 | C        | $7.8 \times 10^{-9}$  | 4.8 | 47.0 | 12%  |
| Ketol-acid reductoisomerase, IlvC                      | Bpr_I1657 | C        | $2.2 \times 10^{-15}$ | 5.1 | 37.3 | 64%  |
| NADPH-dependent glutamate synthase, GltA3              | Bpr_I1306 | C        | $1.0 \times 10^{-30}$ | 5.0 | 49.3 | 17%  |
| OAH/OAS sulfhydrylase                                  | Bpr_I0317 | C        | $6.4 \times 10^{-11}$ | 5.4 | 45.6 | 12%  |

Table S2. *Cont.*

| Protein                                                                            | Locus     | Location | Score                 | pI  | kDa  | Cov. |
|------------------------------------------------------------------------------------|-----------|----------|-----------------------|-----|------|------|
| <b>Amino Acid Biosynthesis</b>                                                     |           |          |                       |     |      |      |
| OAH/OAS sulfhydrylase                                                              | Bpr_I2467 | C        | $2.1 \times 10^{-14}$ | 5.6 | 45.9 | 25%  |
| Phosphoserine aminotransferase, SerC                                               | Bpr_I1341 | C        | $3.8 \times 10^{-14}$ | 5.0 | 40.1 | 51%  |
| Phosphoserine phosphatase/homoserine phosphotransferase bifunctional protein, ThrH | Bpr_I1141 | C        | $1.4 \times 10^{-11}$ | 4.5 | 22.4 | 10%  |
| Serine hydroxymethyltransferase, GlyA                                              | Bpr_I1796 | C        | $8.6 \times 10^{-13}$ | 6.2 | 44.9 | 21%  |
| Threonine dehydratase, IlvA                                                        | Bpr_I1571 | C        | $5.4 \times 10^{-10}$ | 6.0 | 44.4 | 8%   |
| Threonine synthase, ThrC                                                           | Bpr_I1058 | C        | $1.1 \times 10^{-16}$ | 4.8 | 54.4 | 35%  |
| Tryptophan synthase $\alpha$ -subunit, TrpA                                        | Bpr_I0008 | C        | $2.0 \times 10^{-7}$  | 4.6 | 27.7 | 10%  |
| Tryptophan synthase $\beta$ -subunit, TrpB2                                        | Bpr_I1140 | C        | $1.1 \times 10^{-8}$  | 5.4 | 50.6 | 11%  |
| <b>Carbohydrate Metabolism</b>                                                     |           |          |                       |     |      |      |
| 1-phosphofructokinase, PfkB                                                        | Bpr_I2103 | C        | $4.1 \times 10^{-12}$ | 5.0 | 32.4 | 14%  |
| 2,3-bisphosphoglycerate-independent phosphoglycerate mutase, GpmA                  | Bpr_I1294 | C        | $1.0 \times 10^{-30}$ | 4.7 | 56.5 | 51%  |
| 2-dehydro-3-deoxygluconokinase, KdgK                                               | Bpr_I0932 | C        | $1.4 \times 10^{-7}$  | 5.5 | 37.2 | 4%   |
| 2-deoxy-D-gluconate 3-dehydrogenase, KduD                                          | Bpr_I0930 | C        | $1.6 \times 10^{-8}$  | 4.6 | 30.2 | 16%  |
| 2-keto-3-deoxygluconate 6-phosphate aldolase/2-keto-4-hydroxyglutarate aldolase    | Bpr_I0931 | C        | $1.5 \times 10^{-12}$ | 5.7 | 34.3 | 18%  |
| 6-phosphofructokinase, PfkA2                                                       | Bpr_I1068 | C        | $5.6 \times 10^{-14}$ | 5.4 | 46.0 | 28%  |
| 6-phosphofructokinase, PfkA4                                                       | Bpr_I2767 | C        | $3.3 \times 10^{-14}$ | 8.1 | 34.8 | 23%  |
| 6-phosphogluconolactonase                                                          | Bpr_I1331 | C        | $1.4 \times 10^{-12}$ | 4.8 | 39.3 | 14%  |
| Aldose 1-epimerase                                                                 | Bpr_I0228 | C        | $1.5 \times 10^{-13}$ | 4.8 | 38.3 | 32%  |
| Altronate oxidoreductase, UxaB                                                     | Bpr_I1275 | C        | $3.8 \times 10^{-11}$ | 4.6 | 56.0 | 7%   |
| Deoxyribose-phosphate aldolase, DeoC                                               | Bpr_I1062 | C        | $8.6 \times 10^{-14}$ | 5.2 | 24.0 | 43%  |
| Fructose-1,6-bisphosphate aldolase FbaA                                            | Bpr_I2903 | C        | $1.0 \times 10^{-30}$ | 5.1 | 30.5 | 77%  |
| Glucokinase, Glk                                                                   | Bpr_I0100 | C        | $2.5 \times 10^{-10}$ | 4.9 | 32.9 | 19%  |
| Glucose-1-phosphate adenylyltransferase, GlgC1                                     | Bpr_I0290 | C        | $8.1 \times 10^{-10}$ | 4.7 | 46.9 | 18%  |
| Glucose-6-phosphate isomerase, Gpi                                                 | Bpr_I0035 | C        | $1.0 \times 10^{-30}$ | 5.0 | 57.1 | 53%  |
| Glucuronate isomerase, UxaC                                                        | Bpr_I1591 | C        | $1.9 \times 10^{-12}$ | 5.0 | 54.4 | 13%  |
| Glyceraldehyde-3-phosphate dehydrogenase, Gap                                      | Bpr_I2050 | C        | $1.0 \times 10^{-30}$ | 5.7 | 36.9 | 41%  |
| Glycogen synthase ADP-glucose type, GlgA                                           | Bpr_I1257 | C        | $1.3 \times 10^{-7}$  | 5.6 | 56.0 | 9%   |
| Lactaldehyde reductase, FucO                                                       | Bpr_I2065 | C        | $1.1 \times 10^{-15}$ | 4.7 | 41.2 | 35%  |
| L-fucose isomerase related protein                                                 | Bpr_I0185 | C        | $1.0 \times 10^{-30}$ | 4.9 | 55.4 | 62%  |
| L-ribulose-5-phosphate 4-epimerase, AraD                                           | Bpr_I2814 | C        | $1.0 \times 10^{-10}$ | 6.0 | 26.0 | 11%  |
| Phosphoenolpyruvate carboxykinase, PckA                                            | Bpr_I0091 | C        | $1.0 \times 10^{-30}$ | 4.9 | 59.5 | 56%  |
| Phosphoglycerate kinase, Pgc                                                       | Bpr_I2049 | C        | $1.0 \times 10^{-30}$ | 5.4 | 43.7 | 69%  |
| Pyruvate kinase, PykA                                                              | Bpr_I0083 | C        | $1.6 \times 10^{-8}$  | 4.8 | 51.7 | 9%   |
| Ribose-phosphate pyrophosphokinase, PrsA1                                          | Bpr_I0286 | C        | $2.7 \times 10^{-13}$ | 5.7 | 45.7 | 22%  |
| Transaldolase                                                                      | Bpr_I1511 | C        | $4.7 \times 10^{-14}$ | 4.8 | 23.4 | 70%  |
| Transketolase subunit A, TktA3                                                     | Bpr_I2813 | C        | $1.1 \times 10^{-16}$ | 5.4 | 30.0 | 29%  |
| Transketolase subunit B, TktB3                                                     | Bpr_I2812 | C        | $1.0 \times 10^{-30}$ | 5.5 | 33.0 | 37%  |
| Triosephosphate isomerase, TpiA                                                    | Bpr_I2048 | C        | $1.0 \times 10^{-30}$ | 4.6 | 26.8 | 84%  |
| Xylulokinase, XylB                                                                 | Bpr_I0173 | C        | $1.8 \times 10^{-14}$ | 4.9 | 53.7 | 27%  |



Table S2. *Cont.*

| Protein                                              | Locus     | Location | Score                 | pI  | kDa   | Cov. |
|------------------------------------------------------|-----------|----------|-----------------------|-----|-------|------|
| <b>Cell Cycle</b>                                    |           |          |                       |     |       |      |
| Cell division protein, FtsZ                          | Bpr_I1862 | C        | $3.7 \times 10^{-14}$ | 5.0 | 42.9  | 27%  |
| DNA polymerase III $\beta$ -subunit, DnaN            | Bpr_I0002 | C        | $5.1 \times 10^{-12}$ | 4.7 | 41.4  | 25%  |
| FtsK/SpoIIIE family protein                          | Bpr_I1301 | M        | $6.7 \times 10^{-5}$  | 5.0 | 105.3 | 5%   |
| Single-stranded DNA binding protein, Ssb1            | Bpr_I0240 | C        | $2.2 \times 10^{-14}$ | 4.7 | 16.6  | 27%  |
| <b>Cell Envelope</b>                                 |           |          |                       |     |       |      |
| Aminotransferase DegT/DnrJ/EryC1/StrS family         | Bpr_I0345 | C        | $1.1 \times 10^{-16}$ | 5.8 | 44.9  | 31%  |
| Aminotransferase DegT/DnrJ/EryC1/StrS family         | Bpr_I2543 | C        | $1.9 \times 10^{-11}$ | 5.1 | 47.3  | 11%  |
| dTDP-4-dehydrorhamnose 3,5-epimerase, RfbC2          | Bpr_I0548 | C        | $2.7 \times 10^{-8}$  | 4.7 | 20.6  | 14%  |
| dTDP-4-dehydrorhamnose reductase, RfbD1              | Bpr_I2582 | C        | $4.5 \times 10^{-10}$ | 4.8 | 32.1  | 15%  |
| dTDP-glucose 4,6-dehydratase, RfbB                   | Bpr_I0545 | C        | $2.2 \times 10^{-11}$ | 5.5 | 44.1  | 20%  |
| Glycosyl transferase GT28 family                     | Bpr_I2555 | C        | $9.5 \times 10^{-7}$  | 4.9 | 40.1  | 9%   |
| NAD dependent epimerase/dehydratase                  | Bpr_I0348 | C        | $3.2 \times 10^{-12}$ | 5.9 | 38.9  | 17%  |
| NAD dependent epimerase/dehydratase                  | Bpr_I2647 | C        | $2.1 \times 10^{-10}$ | 5.5 | 38.8  | 8%   |
| NAD-dependent epimerase/dehydratase                  | Bpr_I0517 | C        | $5.4 \times 10^{-14}$ | 4.9 | 42.0  | 9%   |
| NAD-dependent epimerase/dehydratase                  | Bpr_I2537 | C        | $1.1 \times 10^{-15}$ | 4.7 | 36.0  | 23%  |
| Nucleotide sugar dehydrogenase                       | Bpr_I0828 | C        | $2.6 \times 10^{-11}$ | 5.0 | 46.1  | 11%  |
| Nucleotide sugar dehydrogenase                       | Bpr_I2538 | C        | $1.8 \times 10^{-9}$  | 4.9 | 48.6  | 6%   |
| Oxidoreductase GFO/IDH/MOCA family                   | Bpr_I0406 | C        | $2.2 \times 10^{-12}$ | 5.6 | 40.5  | 9%   |
| Phosphoglucomutase/phosphomannomutase family protein | Bpr_I0554 | C        | $1.0 \times 10^{-30}$ | 4.7 | 66.0  | 38%  |
| Polysaccharide biosynthesis protein                  | Bpr_I2562 | C        | $5.3 \times 10^{-14}$ | 5.1 | 43.6  | 23%  |
| Rod shape-determining protein, MreB1                 | Bpr_I1486 | C        | $1.1 \times 10^{-15}$ | 5.5 | 36.6  | 20%  |
| UDP-galactopyranose mutase, Glf                      | Bpr_I2305 | C        | $3.6 \times 10^{-11}$ | 4.8 | 46.2  | 9%   |
| <b>Cellular Processes</b>                            |           |          |                       |     |       |      |
| Flagellin, FliC1                                     | Bpr_I0488 | C        | $1.7 \times 10^{-10}$ | 5.2 | 31.4  | 27%  |
| Flagellin, FliC2                                     | Bpr_I0489 | C        | $1.0 \times 10^{-30}$ | 5.2 | 30.8  | 28%  |
| Flavin reductase domain-containing protein           | Bpr_I0363 | C        | $7.5 \times 10^{-11}$ | 5.1 | 23.4  | 18%  |
| Rubryerythrin, Rbr1                                  | Bpr_I0031 | C        | $3.4 \times 10^{-9}$  | 5.1 | 19.7  | 34%  |
| Rubryerythrin, Rbr2                                  | Bpr_I0362 | C        | $1.6 \times 10^{-12}$ | 4.9 | 21.3  | 34%  |
| Superoxide dismutase, SodA                           | Bpr_I0467 | C        | $1.0 \times 10^{-30}$ | 5.3 | 24.1  | 67%  |
| <b>Central Metabolism</b>                            |           |          |                       |     |       |      |
| Carboxynorspermidine dehydrogenase                   | Bpr_I1198 | C        | $2.9 \times 10^{-11}$ | 4.6 | 47.4  | 9%   |
| Formate-tetrahydrofolate ligase, Fhs                 | Bpr_I1302 | C        | $1.0 \times 10^{-30}$ | 6.0 | 60.0  | 24%  |
| S-adenosylmethionine synthetase, MetK                | Bpr_I2769 | C        | $1.9 \times 10^{-13}$ | 4.9 | 43.1  | 57%  |
| <b>Energy Metabolism</b>                             |           |          |                       |     |       |      |
| 3-hydroxybutyryl-CoA dehydrogenase, Hbd              | Bpr_I2486 | S        | $1.0 \times 10^{-30}$ | 5.2 | 31.2  | 71%  |
| Acetate kinase, AckA                                 | Bpr_I1580 | C        | $7.0 \times 10^{-13}$ | 5.9 | 42.7  | 29%  |
| Acetyl-CoA synthetase, AscA                          | Bpr_I1274 | C        | $2.3 \times 10^{-13}$ | 6.0 | 64.9  | 9%   |
| Aconitate hydratase, AcnA                            | Bpr_I2797 | C        | $5.9 \times 10^{-10}$ | 5.3 | 82.7  | 8%   |
| ATP synthase F1 $\alpha$ -subunit, AtpA1             | Bpr_I0166 | C        | $1.9 \times 10^{-12}$ | 5.3 | 55.0  | 27%  |
| ATP synthase F1 $\beta$ -subunit, AtpD1              | Bpr_I0168 | C        | $6.9 \times 10^{-13}$ | 4.6 | 50.3  | 45%  |
| ATP synthase F1 $\beta$ -subunit, AtpD2              | Bpr_I1162 | C        | $3.0 \times 10^{-8}$  | 4.5 | 50.9  | 16%  |
| Butyrate kinase, Buk                                 | Bpr_I2323 | C        | $9.9 \times 10^{-15}$ | 5.1 | 38.7  | 74%  |

Table S2. *Cont.*

| Protein                                                 | Locus      | Location | Score                 | pI  | kDa   | Cov. |
|---------------------------------------------------------|------------|----------|-----------------------|-----|-------|------|
| <b>Energy Metabolism</b>                                |            |          |                       |     |       |      |
| Butyryl-CoA dehydrogenase, Bcd                          | Bpr_I2485  | C        | $1.0 \times 10^{-30}$ | 6.1 | 42.5  | 73%  |
| Crotonase, Crt                                          | Bpr_I2487  | C        | $1.0 \times 10^{-30}$ | 4.7 | 28.0  | 55%  |
| Electron transfer flavoprotein $\alpha$ -subunit, EtfA  | Bpr_I2483  | C        | $1.0 \times 10^{-30}$ | 4.8 | 37.4  | 46%  |
| Electron transfer flavoprotein $\beta$ -subunit, EtfB   | Bpr_I2484  | C        | $2.2 \times 10^{-15}$ | 5.2 | 28.4  | 44%  |
| Iron-containing alcohol dehydrogenase                   | Bpr_I1425  | C        | $1.0 \times 10^{-30}$ | 5.1 | 44.4  | 52%  |
| Isocitrate dehydrogenase, Icd                           | Bpr_I1102  | C        | $1.1 \times 10^{-15}$ | 5.1 | 45.1  | 16%  |
| Malate dehydrogenase, Mdh                               | Bpr_I2277  | C        | $2.4 \times 10^{-9}$  | 4.8 | 41.4  | 9%   |
| Methylmalonyl-CoA decarboxylase $\alpha$ -subunit, MmdA | Bpr_I1226  | C        | $5.3 \times 10^{-14}$ | 4.5 | 50.9  | 24%  |
| Oxaloacetate decarboxylase $\alpha$ -subunit, Oada      | Bpr_I1230  | C        | $1.1 \times 10^{-15}$ | 5.2 | 52.4  | 18%  |
| Phosphate acetyltransferase, Pta                        | Bpr_III010 | C        | $2.2 \times 10^{-16}$ | 4.7 | 22.3  | 32%  |
| Phosphate acetyltransferase, Pta                        | Bpr_III011 | C        | $7.9 \times 10^{-13}$ | 5.2 | 14.4  | 59%  |
| Phosphate butyryltransferase, Ptb                       | Bpr_I2324  | C        | $5.6 \times 10^{-16}$ | 5.1 | 33.3  | 57%  |
| Pyruvate carboxyltransferase domain-containing protein  | Bpr_I1100  | C        | $5.4 \times 10^{-5}$  | 5.4 | 57.2  | 7%   |
| Pyruvate formate lyase, PflB                            | Bpr_I0112  | C        | $1.0 \times 10^{-30}$ | 5.7 | 84.9  | 65%  |
| Pyruvate phosphate dikinase, PpdK                       | Bpr_I1154  | C        | $1.0 \times 10^{-30}$ | 4.8 | 104.3 | 52%  |
| Pyruvate:ferredoxin oxidoreductase                      | Bpr_I0269  | C        | $1.0 \times 10^{-30}$ | 5.2 | 127.3 | 48%  |
| Thiolase, ThlA1                                         | Bpr_I2488  | C        | $1.0 \times 10^{-30}$ | 5.0 | 42.0  | 68%  |
| Thiolase, ThlA2                                         | Bpr_I2475  | S        | $1.0 \times 10^{-30}$ | 6.0 | 41.0  | 66%  |
| <b>Hypothetical</b>                                     |            |          |                       |     |       |      |
| Hypothetical protein                                    | Bpr_I0212  | C        | $1.1 \times 10^{-16}$ | 5.2 | 41.6  | 28%  |
| Hypothetical protein                                    | Bpr_I0219  | S        | $8.9 \times 10^{-11}$ | 3.9 | 30.3  | 5%   |
| Hypothetical protein                                    | Bpr_I0280  | C        | $2.4 \times 10^{-11}$ | 8.4 | 23.2  | 15%  |
| Hypothetical protein                                    | Bpr_I0351  | C        | $3.6 \times 10^{-14}$ | 5.0 | 34.4  | 6%   |
| Hypothetical protein                                    | Bpr_I0566  | M        | $5.4 \times 10^{-9}$  | 9.9 | 28.0  | 5%   |
| Hypothetical protein                                    | Bpr_I0799  | C        | $1.9 \times 10^{-8}$  | 4.1 | 13.5  | 14%  |
| Hypothetical protein                                    | Bpr_I0801  | C        | $1.1 \times 10^{-11}$ | 4.3 | 23.4  | 21%  |
| Hypothetical protein                                    | Bpr_I0874  | C        | $2.1 \times 10^{-10}$ | 4.5 | 14.8  | 13%  |
| Hypothetical protein                                    | Bpr_I0876  | S        | $2.0 \times 10^{-4}$  | 4.2 | 63.1  | 3%   |
| Hypothetical protein                                    | Bpr_I0952  | C        | $2.2 \times 10^{-15}$ | 3.8 | 37.2  | 26%  |
| Hypothetical protein                                    | Bpr_I1041  | C        | $8.1 \times 10^{-12}$ | 4.1 | 9.3   | 39%  |
| Hypothetical protein                                    | Bpr_I1177  | C        | $3.6 \times 10^{-13}$ | 4.3 | 24.7  | 9%   |
| Hypothetical protein                                    | Bpr_I1179  | C        | $1.0 \times 10^{-30}$ | 4.7 | 24.9  | 51%  |
| Hypothetical protein                                    | Bpr_I1180  | C        | $1.0 \times 10^{-30}$ | 7.4 | 36.4  | 66%  |
| Hypothetical protein                                    | Bpr_I1300  | C        | $3.6 \times 10^{-12}$ | 4.7 | 21.8  | 50%  |
| Hypothetical protein                                    | Bpr_I1457  | C        | $3.8 \times 10^{-9}$  | 4.2 | 25.9  | 18%  |
| Hypothetical protein                                    | Bpr_I1473  | C        | $1.8 \times 10^{-10}$ | 5.4 | 24.1  | 18%  |
| Hypothetical protein                                    | Bpr_I1477  | C        | $3.5 \times 10^{-12}$ | 4.2 | 19.1  | 29%  |
| Hypothetical protein                                    | Bpr_I1479  |          |                       |     |       |      |
